# Supplementary material for: Synthesis, thermogravimetric analysis and enthalpy determination of lanthanide β-diketonates
Source: publisher site journal article supplement (doi:10.1515/ract-2018-3085), 2019-04-13
Supplement: Supplementary file 1 [file ract-2018-3085_suppl.docx]

1. Supplementary information
   1. FTIR


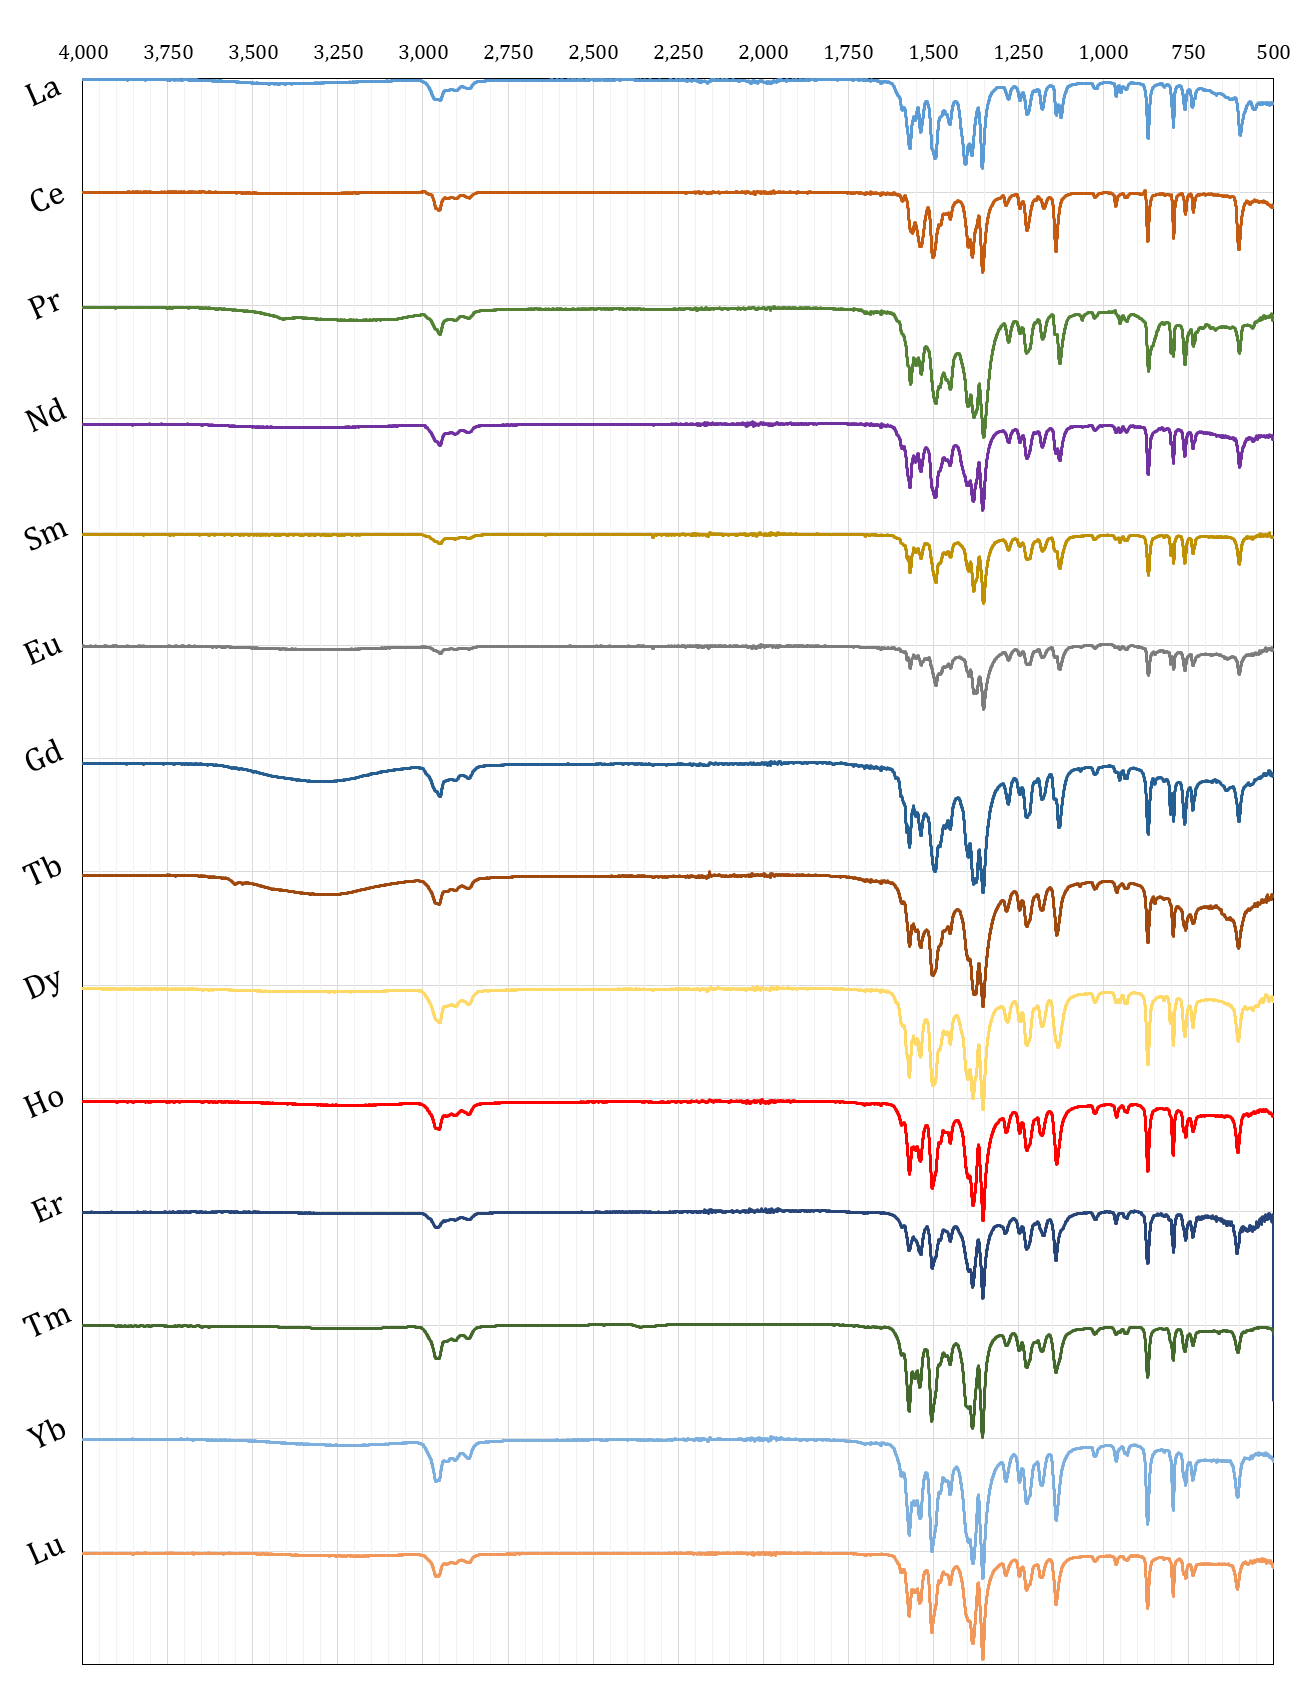


Fig. 6: FT-IR spectra for the lanthanide Dipivaloylmethanates


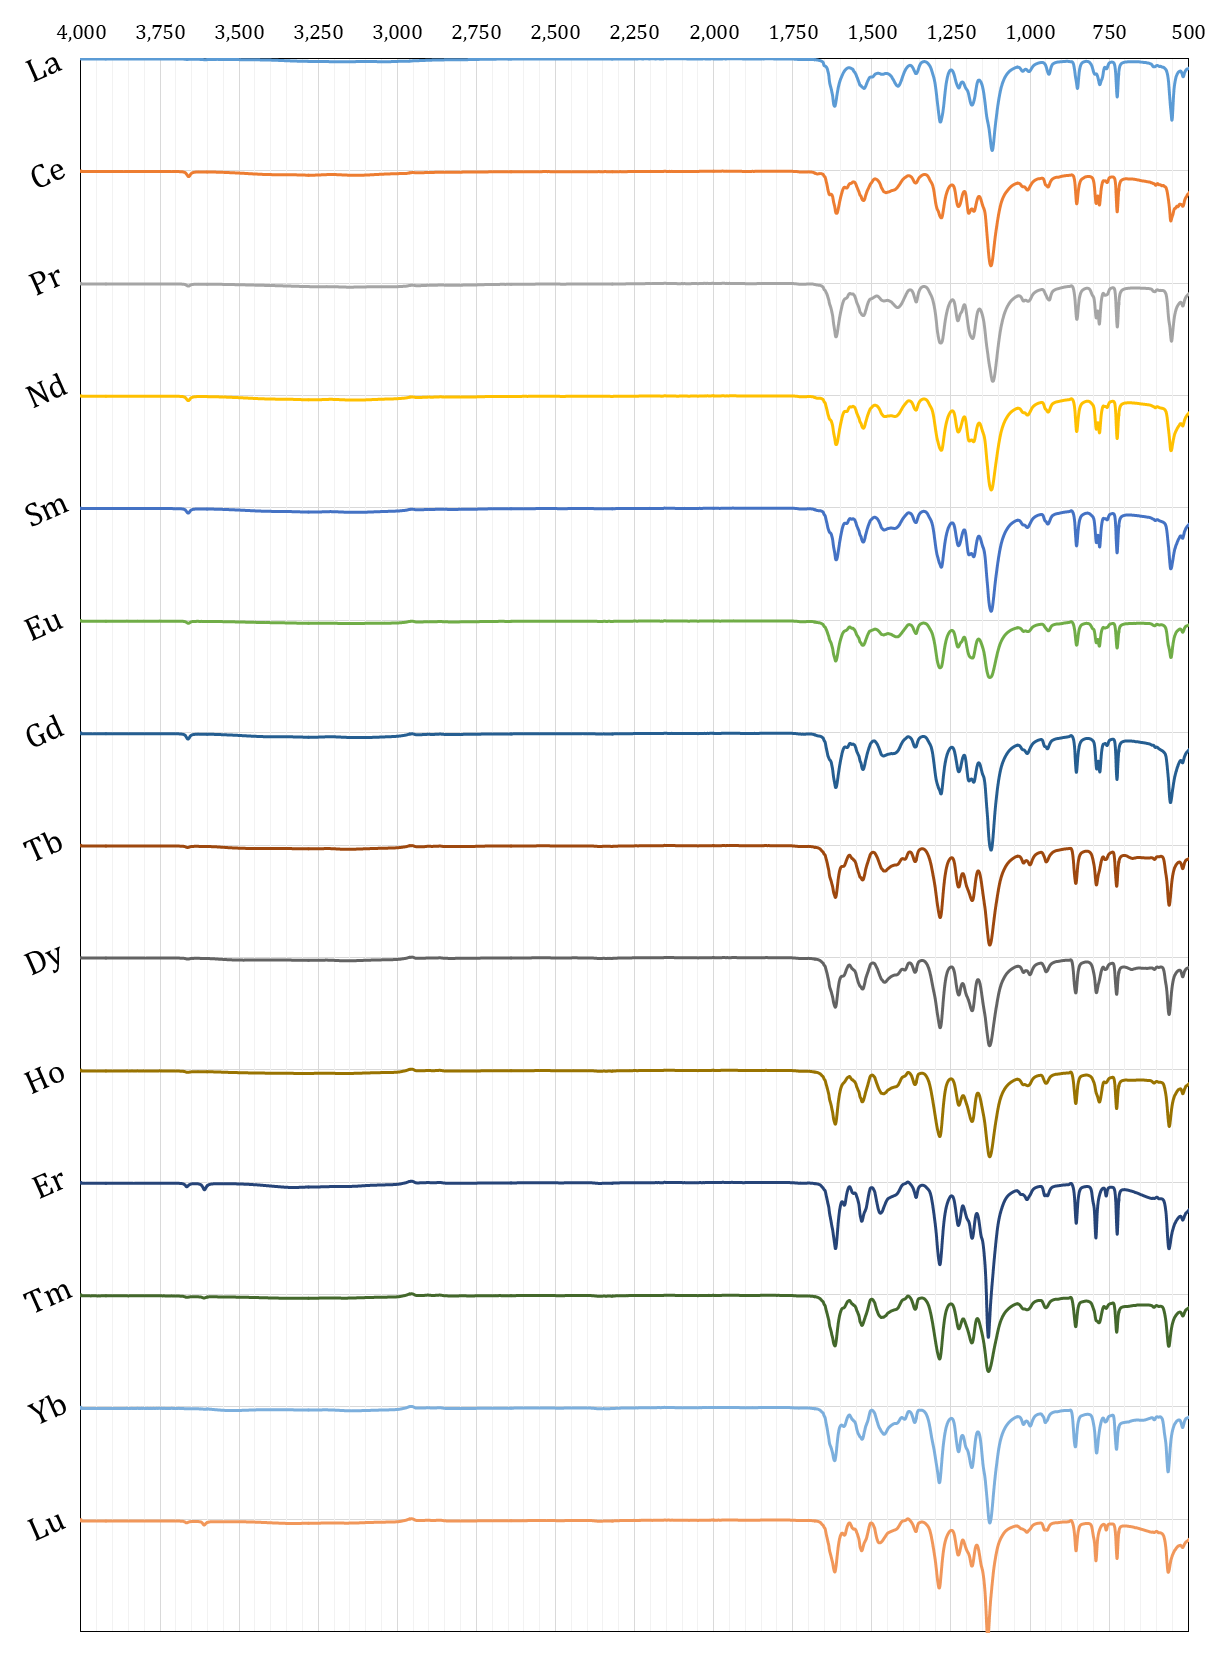


Fig. 7: FTIR Data for the Ln[tfac]3 compounds.


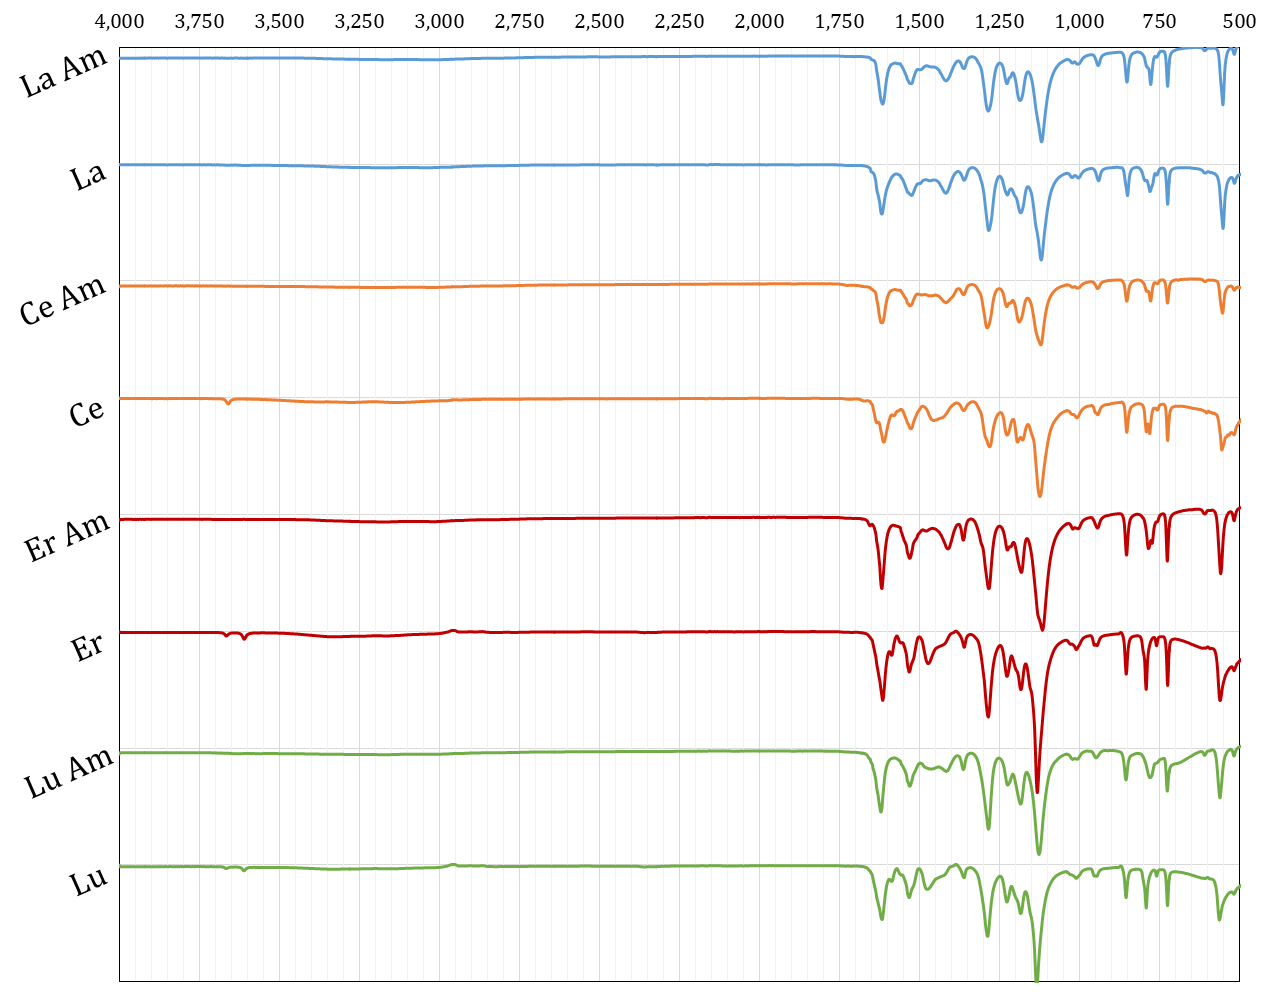


Fig. 8: Comparison of FTIR curves for the ammines (“Ln Am”) and hydrates (“Ln”) of Ln[tfac]3.


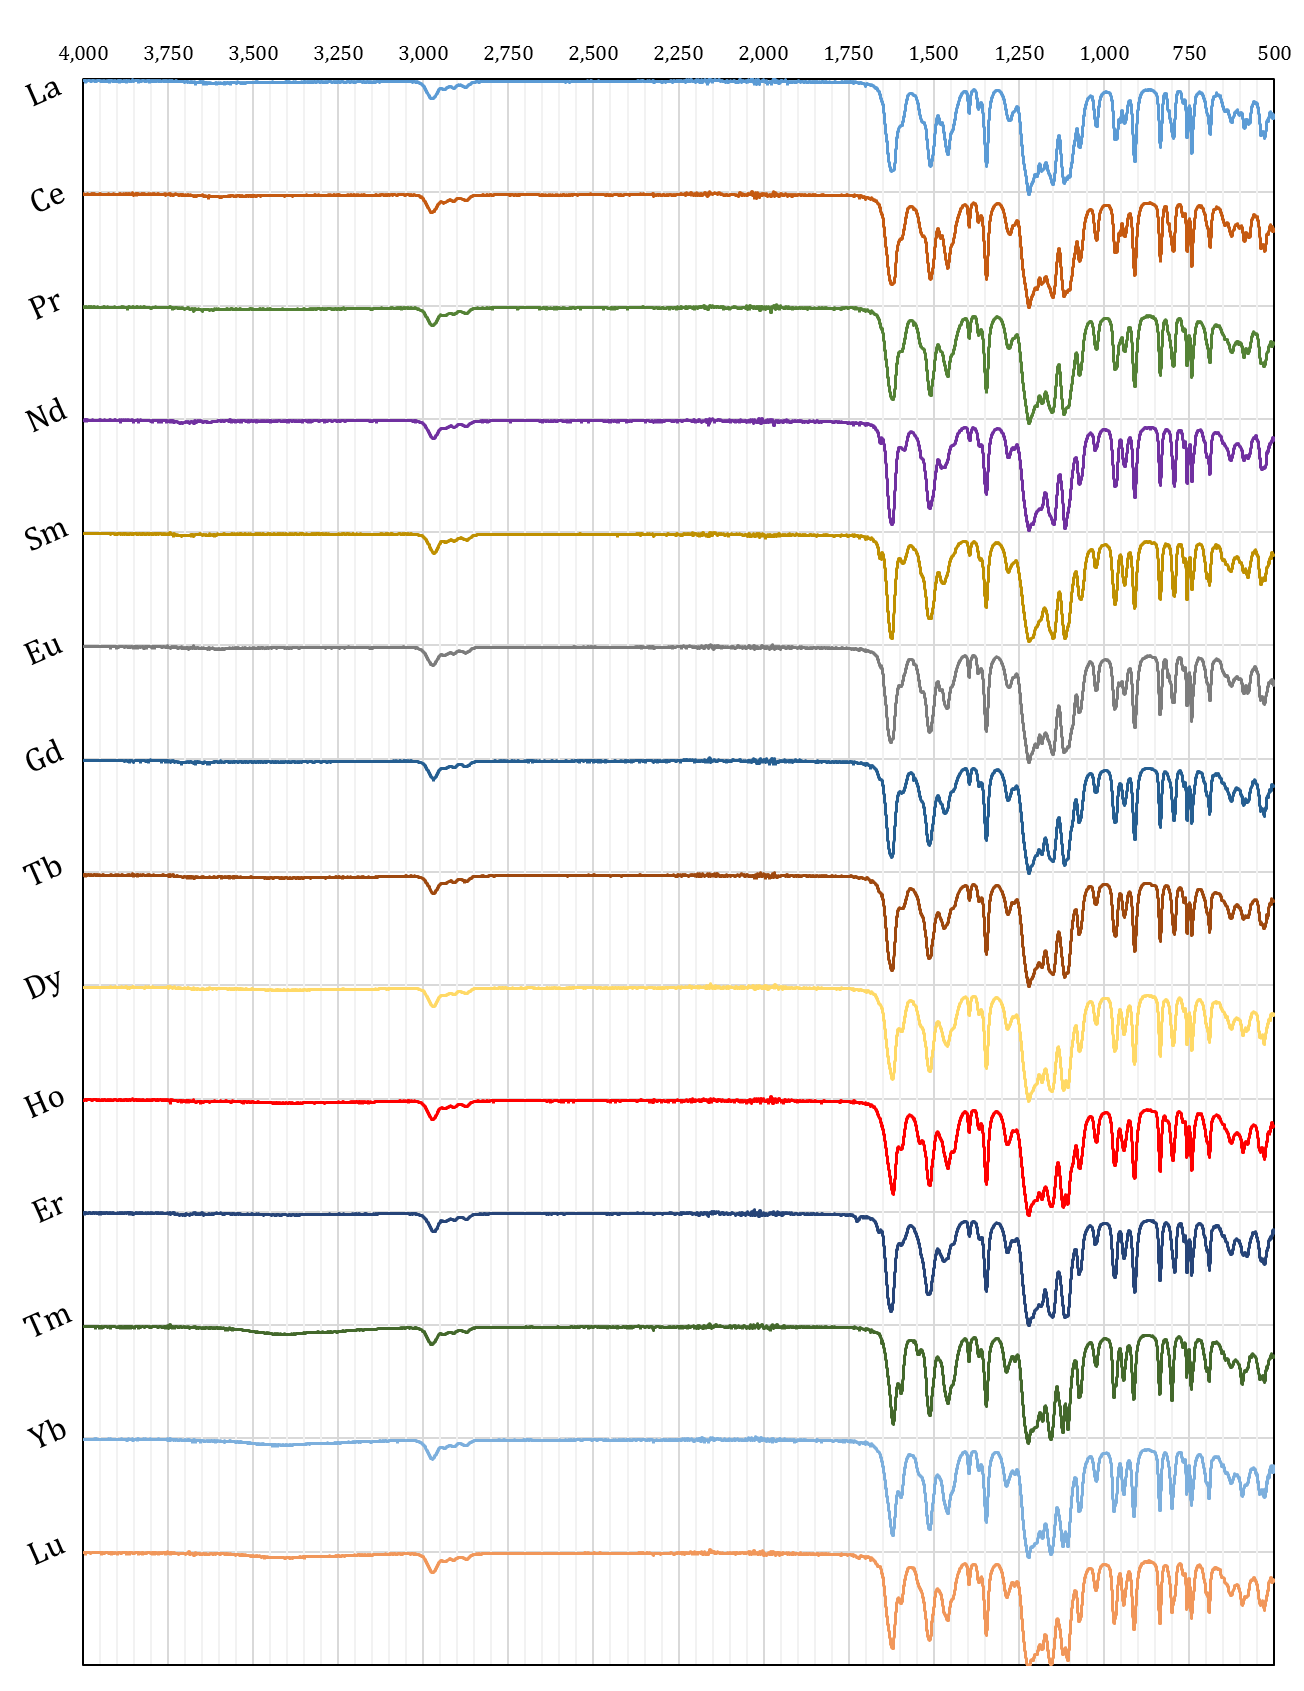


Fig. 9: FT-IR spectra for the lanthanide heptafluorodimethyloctanedionates.

Table 7 Infrared spectral results for Ln[dpm]n complexesa

| cm-1 | peak | cm-1 | peak | cm-1 | peak |
| --- | --- | --- | --- | --- | --- |
| 2950 | m, sh | 1380 | s, sh | 1135 | m |
| 2860 | w | 1350 | s | 868 | s |
| 1570 | m, sh | 1285 | w | 793 | m, sh |
| 1540 | m | 1250 | w | 760 | w |
| 1495 | s, sh | 1220 | w, sh | 735 | w |
| 1450 | w | 1180 | w | 600 | m |

aSpectral notations: s, strong intensity; m, medium intensity; w, weak intensity; b, broad; sh, shoulder

Table 8 Infrared spectral results for Ln[fod]3 complexesa

| cm-1 | peak | cm-1 | peak | cm-1 | peak |
| --- | --- | --- | --- | --- | --- |
| 3600 | w, b | 1225 | s, b | 835 | m |
| 2950 | w | 1195 | s, sh | 795 | m |
| 1620 | s | 1180 | s | 755 | m, sh |
| 1595 | m, sh | 1150 | s, sh | 740 | m |
| 1530 | m, sh | 1115 | s | 695 | m, sh |
| 1510 | s | 1105 | s, sh | 690 | m |
| 1465 | m | 1070 | m | 625 | w |
| 1395 | m | 1020 | w | 590 | w |
| 1370 | m, sh | 965 | m | 575 | w |
| 1345 | s | 940 | w | 540 | w |
| 1275 | m | 910 | m | 525 | w |

aSpectral notations: s, strong intensity; m, medium intensity; w, weak intensity; b, broad; sh, shoulder

Table 9 Infrared spectral results for Ln[tfac]3 complexesa

| cm-1 | peak | cm-1 | peak | cm-1 | peak |
| --- | --- | --- | --- | --- | --- |
| 3660 | w | 1230 | m | 790 | m |
| 1620 | s, sh | 1180 | s, sh | 780 | m |
| 1530 | m, sh | 1120 | s | 760 | w |
| 1420 | w, b | 1010 | w, sh | 725 | m |
| 1360 | w | 940 | w | 553 | s |
| 1280 | s, sh | 850 | m | 517 | w |

aSpectral notations: s, strong intensity; m, medium intensity; w, weak intensity; b, broad; sh, shoulder
